RESEARCH ARTICLE

# Comparison of Multiple Displacement Amplification (MDA) and Multiple Annealing and Looping-Based Amplification Cycles (MALBAC) in Single-Cell Sequencing

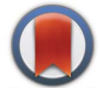

CrossMark  
click for updates

 OPEN ACCESS

**Citation:** Chen M, Song P, Zou D, Hu X, Zhao S, et al. (2014) Comparison of Multiple Displacement Amplification (MDA) and Multiple Annealing and Looping-Based Amplification Cycles (MALBAC) in Single-Cell Sequencing. PLoS ONE 9(12): e114520. doi:10.1371/journal.pone.0114520

**Editor:** Deyou Zheng, Albert Einstein College of Medicine, United States of America

**Received:** June 13, 2014

**Accepted:** November 9, 2014

**Published:** December 8, 2014

**Copyright:** © 2014 Chen et al. This is an open-access article distributed under the terms of the [Creative Commons Attribution License](https://creativecommons.org/licenses/by/4.0/), which permits unrestricted use, distribution, and reproduction in any medium, provided the original author and source are credited.

**Data Availability:** The authors confirm that all data underlying the findings are fully available without restriction. All files are available from the NCBI SRA database (accession numbers SRP013494, SRR618666).

**Funding:** This work was supported by School of Bioscience and Bioengineering, South China University of Technology and BGI-ShenZhen. This project was granted by the National Natural Science Foundation of China (31271322) and the Fundamental Research Funds for the Central Universities of South China University of Technology (2014ZG0017). BGI-ShenZhen provided support in the form of salaries for authors MC, XH, SZ & SG, but did not have any additional role in the study design, data collection and analysis, decision to publish, or preparation of the manuscript. The specific roles of these authors are articulated in the 'author contributions' section.

**Competing Interests:** MC, XH, SZ & SG are employees of BGI-ShenZhen, whose company partly funded this study. There are no patents, products in development or marketed products to declare. This does not alter the authors' adherence to all the PLOS ONE policies on sharing data and materials.

**Minfeng Chen**<sup>1,2,3</sup>, **Pengfei Song**<sup>3,9</sup>, **Dan Zou**<sup>4</sup>, **Xuesong Hu**<sup>2</sup>, **Shancen Zhao**<sup>2,6\*</sup>, **Shengjie Gao**<sup>2,5\*</sup>, **Fei Ling**<sup>1\*</sup>

**1.** School of Bioscience and Bioengineering, South China University of Technology, Guangzhou, 510006, China, **2.** BGI-Shenzhen, Shenzhen, 518083, China, **3.** The fourth people's hospital of Shenzhen (Futian hospital), Shenzhen, 518033, China, **4.** School of Computer, National University of Defense Technology, Changsha, 410073, China, **5.** State Key Laboratory of Agrobiotechnology and School of Life Sciences, The Chinese University of Hong Kong, Hong Kong, China, **6.** Department of Molecular Medicine, Aarhus University Hospital, Aarhus, Denmark

\*[lingfeiscut@gmail.com](mailto:lingfeiscut@gmail.com) (FL); [gaoshengjie@genomics.cn](mailto:gaoshengjie@genomics.cn) (SG); [zhaoshancen@genomics.cn](mailto:zhaoshancen@genomics.cn) (SZ)

 These authors contributed equally to this work.

## Abstract

Single-cell sequencing promotes our understanding of the heterogeneity of cellular populations, including the haplotypes and genomic variability among different generation of cells. Whole-genome amplification is crucial to generate sufficient DNA fragments for single-cell sequencing projects. Using sequencing data from single sperms, we quantitatively compare two prevailing amplification methods that extensively applied in single-cell sequencing, multiple displacement amplification (MDA) and multiple annealing and looping-based amplification cycles (MALBAC). Our results show that MALBAC, as a combination of modified MDA and tweaked PCR, has a higher level of uniformity, specificity and reproducibility.

## Introduction

Single-cell studies by whole genome amplification were proposed to investigate cellular behaviors from a broad range of environmental and clinical specimens. With the advance of next generation sequencing technologies, single-cell sequencing is expected to result in a novel understanding of genomic stability at the level of per cell cycle in various cell types. There have been several studies on genome-wide sequencing of single cells, which opened an era for investigating

haplotype [1–3] and genomic variability [4, 5], especially in monitoring stem cells and tracking of tumor evolution [6]. The quality and quantity of DNA samples are critical for high-throughput sequencing and genetic analysis. Technically, these studies rely on whole-genome amplification from a single cell to generate enough DNA for sequencing library construction [7–11]. However, the experimental methods employed in previous reports are prone to amplification bias in some degree, resulting in non-random genome coverage. Thus, a crucial innovation in single-cell sequencing is to put in place strategies for whole-genome amplification with minimal amplification bias.

Polymerase chain reaction (PCR) based amplification introduces sequence-dependent bias due to the exponential amplification with random primers [7, 8, 12]. Multiple displacement  $\phi$ 29 DNA polymerase with random primers under isothermal conditions has been widely improved and widely applied in single-cell sequencing projects [9, 13, 14]. Even though, some bias that resulted from non-linear amplification and chimera still exists [15, 16]. The polymerase displaces downstream DNA strand to extend the growing strand, which, results in a branching form of amplification [17]. Compared with PCR-based methods, MDA reduces amplification bias by three to four orders of magnitude and generates much longer amplicons with average length >12 kb [13]. However, amplification bias still exists in MDA method, which can confuse the heterozygous loci as homozygous ones. Owing to this reason, multiple single-cell sequencings and bulk DNA extractions become necessary for the application of MDA in detecting single nucleotide polymorphisms in diploid genomes [6, 18].

An alternative method of whole genome amplification, so-called multiple annealing and looping-based amplification cycles (MALBAC), emerged recently [5, 17]. Combining advantage features of MDA and tweaked PCR, MALBAC substantially reduces experimental bias related to non-linear amplification. Amplification with MALBAC is initiated with a batch of random primers that can evenly hybridize to the templates at 0°C. Each random primer has a common 27-nucleotide sequence and 8 variable nucleotides. After a 5-cycle initial reaction, specific DNA polymerases with strand-displacement activity were used to generate semi-amplicons at 65°C. The same primers having complementary ends were then used to generate full amplicons after the annealing at 94°C. As the common sequence of random primer on terminal can form pan-like amplicons, enough quantity of DNA production for sequencing will be obtained after an 18-cycle regular PCR amplification. By this approach, MALBAC method can prevent a lot of random amplification bias. Since MALBAC can evenly amplify all the chromosomes in a diploid species, it improves the accuracy of heterozygous SNP calling.

Although it reported that MALBAC is superior to MDA in cancer cells [5], the efficacy of its application in diverse cell types needs to be evaluated. To provide a comprehensive comparison of the two methods, we analyzed six human sperm samples from recent single-cell sequencing projects, of which three amplified using MDA [3] and three using MALBAC [5], respectively.

## Materials and Methods

### Public data availability

The sequencing reads of single sperm cells employed in our analysis was downloaded from NCBI Short Read Archive (SRA). The accession numbers of MDA and MALBAC samples were SRP013494 and SRP017186, respectively. The whole genome sequencing reads of a blood tissue, which was from the same person with the MALBAC samples, were downloaded with the accession number SRR618666. All samples were sequenced using generated from short insert libraries on Illumina HiSeq 2000 with an average of 26.7 Gb and a standard deviation of 1.38 Gb according to SRA record. The sample information was retrieved from the corresponding instruction in NCBI ([S1 Table](#)).

### Analysis of $K$ -mer frequency

The uniformity and reproducibility among different samples can be reflected by the distribution of  $K$ -mer frequency. Disk-based  $K$ -mer counting method [19] was utilized to analyze  $K$ -mer frequency in the sequencing data of each sample.  $K$  was set to 25 in our analysis. Theoretic value of  $\lambda$  in Poisson distribution was calculated as:

$$\lambda_{\text{Poisson}} = (N_{\text{base}}/G_{\text{reference}}) \times (L_{\text{read}} - K + 1)/L_{\text{read}};$$

Here:  $N_{\text{base}}$  represents the total base number;  $L_{\text{read}}$  represents the read length,  $K$  is 25 as mentioned above, and  $G_{\text{reference}}$  denotes the reference genome size 3095.7 Mb for GRCh37.  $K$ -mer coverage depth was determined as described by Li *et al.* [20].

### Reads alignment

The alignment software BWA v0.6.1 [21] was used to align short reads of each sample to the human reference GRCh37. The quality trimming parameter of BWA was set to 10. A pair of reads were used in subsequent analysis only if one or both reads in the pair was uniquely mapped to the reference.

### Calculating genome coverage

The uniquely mapped reads described above were used to calculate the genome coverage for each sample. A sliding window of 1 Mb was designed to count uniquely mapped reads as it slipped along the reference. The sequencing coverage and depth of each window was calculated using SAMTOOLS [22]. Kendall's test coefficient  $\tau$  was used to measure the difference of sequencing coverage and depth on different autosomes.

## SNP calling

The maximum likelihood estimation method was applied to population SNP calling. Genotype likelihood of each genomic site for each line was calculated by SAMTOOLS and BCFTOOLS [22] for each sample. The SNP filtering parameters for BCFTOOLS are “varFilter -Q 50 -d 5 -D 60”, which mean that the minimum mapping quality, the minimum and maximum depth for each SNP is 50, 5 and 60, respectively. The NCBI Human dbSNP (Build 142) [23] was used to estimate the quality of SNP calling.

## Results

### The distribution of $K$ -mer frequency

Approximately, 27 Gb and 26 Gb raw sequencing data was downloaded for each MDA-based and MALBAC-based sample, respectively (S1 Table). We also retrieved 46 Gb whole-genome sequencing reads from blood tissues for our analysis. The goodness of fit between the theoretical and practical distribution of  $K$ -mer frequency reflects the sequencing uniformity and reproducibility [24]. Histogram figures of practical and theoretical Poisson distribution of  $K$ -mer frequency tell a better consistency in whole-genome sequencing blood sample than the sperms (Fig. 1). Only  $K$ -mer frequency from blood sample matches theoretical Poisson distribution very well, indicating whole-genome amplification methods still need technical improvements (S2 Table).

However, the Poisson distribution could be biased due to reasons such as genome composition, sequencing methods, assembly errors, *etc.* To access the two methods without Poisson assumption, we chose the non-parametric Kolmogorov-Smirnov (K-S) test to compare two samples. The two-sample K-S test is one of the most useful and general nonparametric methods, as it is sensitive to differences in both location and shape of the empirical cumulative distributions of two samples. The  $P$  values in MDA samples are slightly higher than those in MALBAC samples, revealing a little better randomness in MDA sequencing (S2 Table). To further compare the reproducibility of two methods, we assessed the joint distribution of  $K$ -mer frequency in two randomly paired samples. The theoretical simulation of the joint distribution shaped a quadrant with a radius of 0.5 and center at (0,0). Referring to the main diagonal line, MALBAC sequencing data show a better mirror symmetry than the MAD-based approach (Fig. 2 and Figures in S1 File). The quadrant area is almost filled up by the joint distribution of  $K$ -mer frequency in the MALBAC-based sequencing data. Consistent with the results of goodness-of-fit test, MALBAC works better than MDA in amplification uniformity for single-cell sequencing.

### Uniformity of genomic coverage

Short reads of different samples were aligned to the human reference using BWA [15]. Approximately an average of 22 Gb raw data for each sample was

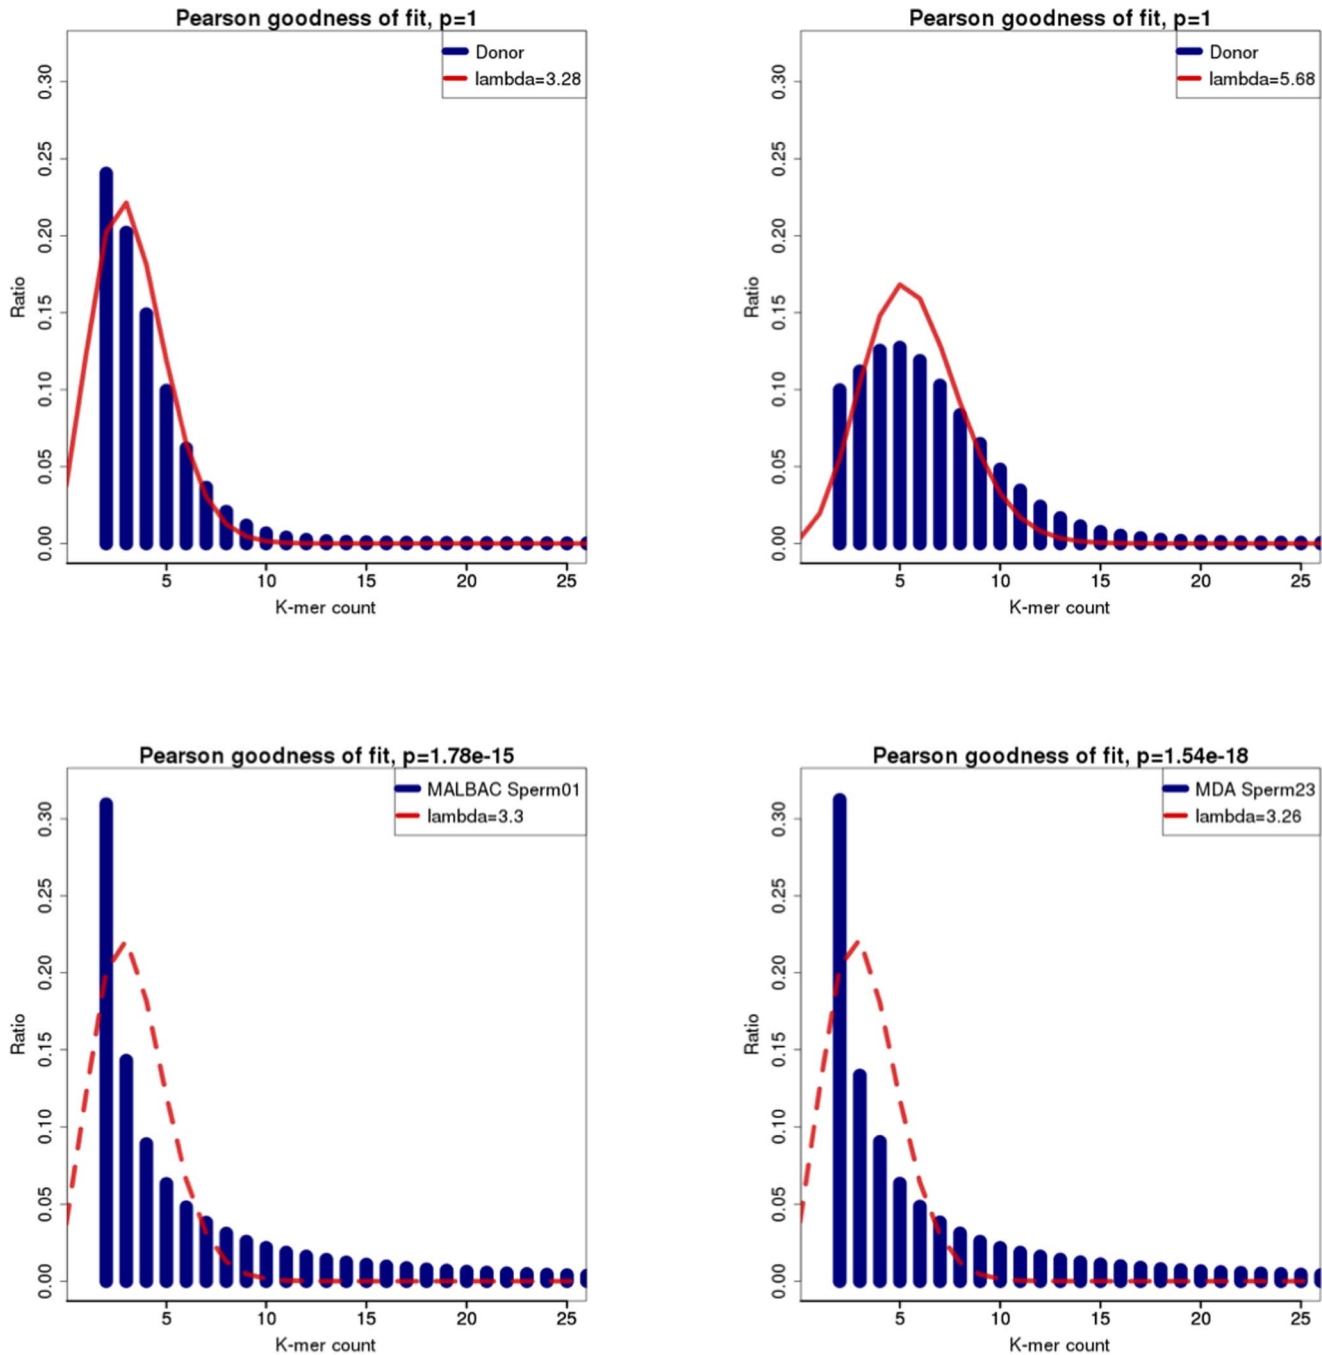

Fig. 1. Histogram shows the accordance of *K*-mer frequency with theoretical Poisson.

doi:10.1371/journal.pone.0114520.g001

successfully mapped to the genome ([Table 1](#) and [S3 Table](#)). The uniquely mapped reads were retained for subsequent analysis, corresponding to 8.1-fold depth for MDA sequencing sample, 6.9-fold depth for MALBAC, and 12.7-fold depth for blood sample, respectively. Since the blood sample was whole genome

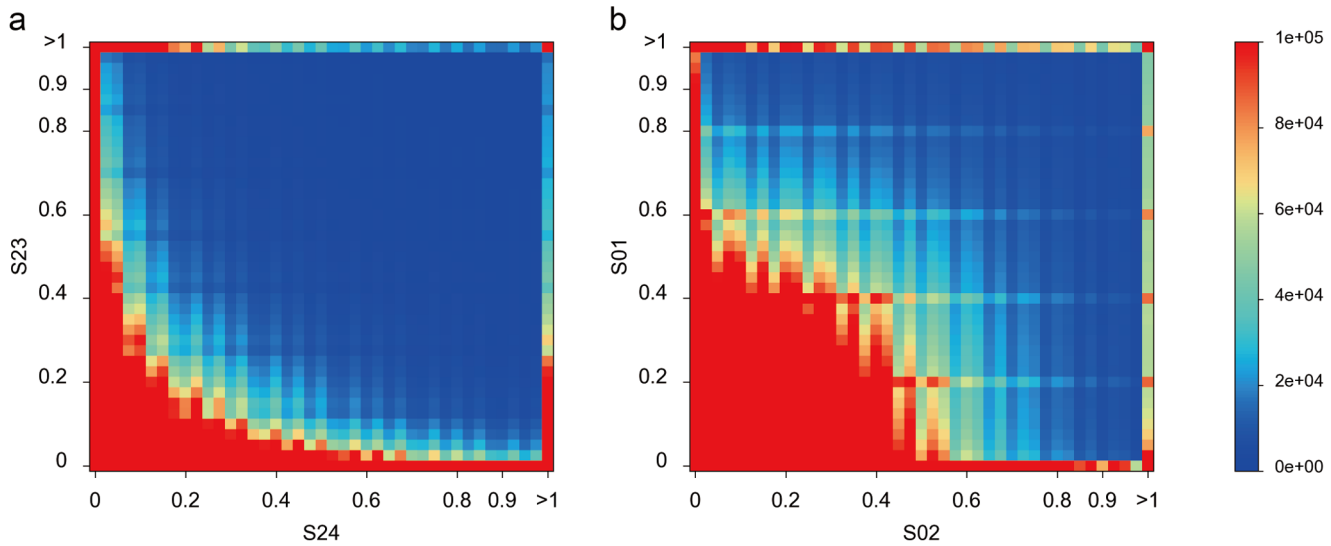

**Fig. 2. The joint distribution of K-mer frequency in two randomly paired samples.**

doi:10.1371/journal.pone.0114520.g002

sequenced, it can be used as control to evaluate the statistics of genome coverage for MDA and MALBAC based sequencing.

Although MALBAC sequencing data were slightly less, their genome coverage is higher than those based on MDA. It is noticed that the mapped reads of MALBAC-based sequencing are short, because of a 27-bp common primer (GTG AGT GAT GGT TGA GGT AGT GTG GAG) were used in the library and then removed after sequencing.

We analyzed the uniformity of genomic coverage between the samples using pairwise Kendall's test. The base coverage is significantly different between MDA and MALBAC sperm samples ( $P < 0.01$ , [S4 Table](#)). The coefficients  $\tau$  of genomic coverage among samples with MALBAC are around 0.75, which are considerably higher than those with MDA ( $\sim 0.3$ ), indicating a better reproducibility using MALBAC method ([Table 2](#) and [S5 Table](#)).

**Table 1. Global Statistics of single-cell sequencing and mapping in different samples.**

| Sample    | Raw Reads   | Read length | Mapped reads | Mapped Bases (Mb) | Uniquely mapped reads | Uniquely mapped Bases (Mb) |
|-----------|-------------|-------------|--------------|-------------------|-----------------------|----------------------------|
| MDA 23    | 282,171,418 | 99          | 258,396,544  | 24,565            | 250,520,102           | 23,816                     |
| MDA 24    | 276,998,928 | 99          | 243,689,828  | 23,241            | 235,286,976           | 22,436                     |
| MDA 28    | 273,358,124 | 99          | 250,026,856  | 23,699            | 242,764,595           | 23,013                     |
| Donor     | 462,571,116 | 100         | 415,071,212  | 37,802            | 396,751,691           | 36,268                     |
| MALBAC 01 | 268,487,462 | 100         | 254,489,098  | 21,179            | 245,501,985           | 20,470                     |
| MALBAC 02 | 267,348,940 | 100         | 253,988,896  | 21,193            | 245,642,239           | 20,540                     |
| MALBAC 03 | 239,882,962 | 100         | 227,489,214  | 19,165            | 219,683,435           | 18,538                     |

doi:10.1371/journal.pone.0114520.t001

**Table 2.** Pairwise Kendall's  $\tau$  coefficient test of reads coverage of different samples on autosomes.

|                  | MDA 23 | MDA 24 | MDA 28 | Donor  | MALBAC 01 | MALBAC 02 | MALBAC 03 |
|------------------|--------|--------|--------|--------|-----------|-----------|-----------|
| <b>MDA 23</b>    | 1      | 0.3014 | 0.3082 | 0.3029 | 0.0223**  | 0.0469    | -0.0256*  |
| <b>MDA 24</b>    |        | 1      | 0.3067 | 0.3055 | 0.0294*   | 0.0591    | -0.0129** |
| <b>MDA 28</b>    |        |        | 1      | 0.3144 | 0.0229**  | 0.0585    | -0.0206** |
| <b>Donor</b>     |        |        |        | 1      | 0.1904    | 0.2330    | 0.1410    |
| <b>MALBAC 01</b> |        |        |        |        | 1         | 0.7754    | 0.7156    |
| <b>MALBAC 02</b> |        |        |        |        |           | 1         | 0.7934    |
| <b>MALBAC 03</b> |        |        |        |        |           |           | 1         |

\* and \*\* means p more than 1% and 5%. Alternative hypothesis: true  $\tau$  is not equal to 0.

doi:10.1371/journal.pone.0114520.t002

We also assessed the correlation of sequencing blood with MALBAC and MDA sperm samples, respectively. The coefficients  $\tau$  of genomic coverage between blood and MALBAC sperms are around 0.15, whereas  $\tau$  between blood and MDA sperms are around 0.25. The larger coefficients represent that MDA is slightly more random than MALBAC. However, genomic coverage of each MDA sample is lower than that of each MALBAC sample ([S1 Figure](#)). A higher coverage in MALBAC samples was also observed from the distribution of covered and uncovered genomic regions using *t*-test ([Table 3 and Figures in S2 File](#)).

Although the MALBAC samples showed a higher level of uniformity than MDA samples, regional amplification bias still exists compared with the blood of whole-genome sequencing. Short reads from MDA samples show higher level of random distribution along the chromosomes, indicating lower amplification specificity than MALBAC samples ([Fig. 3a](#)). To separately survey the covered and uncovered regions, we further compared coverage depth in each sliding window and observed a higher coverage rate in MALBAC samples than other samples in most sliding windows. Examining the average depth in windows, MDA samples have more random peaks, which indicate lower reproducibility than MALBAC samples ([Fig. 3b](#)).

**Table 3.** Pairwise Kendall's  $\tau$  coefficient test of uncovered ratio in 1 M windows of different samples on autosomes.

|                  | MDA 23 | MDA 24 | MDA 28 | Donor  | MALBAC 01 | MALBAC 02 | MALBAC 03 |
|------------------|--------|--------|--------|--------|-----------|-----------|-----------|
| <b>MDA 23</b>    | 1      | 0.4298 | 0.4682 | 0.3867 | 0.1954    | 0.2195    | 0.0906    |
| <b>MDA 24</b>    |        | 1      | 0.4709 | 0.3835 | 0.2058    | 0.2336    | 0.1171    |
| <b>MDA 28</b>    |        |        | 1      | 0.4085 | 0.1973    | 0.2245    | 0.0955    |
| <b>Donor</b>     |        |        |        | 1      | 0.2503    | 0.2697    | 0.1668    |
| <b>MALBAC 01</b> |        |        |        |        | 1         | 0.5241    | 0.5808    |
| <b>MALBAC 02</b> |        |        |        |        |           | 1         | 0.5568    |
| <b>MALBAC 03</b> |        |        |        |        |           |           | 1         |

doi:10.1371/journal.pone.0114520.t003

### Application in SNP identification

To evaluate the performance of MALBAC and MDA methods in variation detection, we identified SNPs with the sequencing samples using maximum likelihood estimation. After strict filtering, more high-quality SNPs were detected and shared in MALBAC samples than MDA samples (Fig. 4a, 4b). It supported the analysis that MALBAC method gets a better performance in amplification uniformity and reproducibility. Besides, the ratio of heterozygous alleles in MDA samples is lower than those in MALBAC samples in SNP calling (S6 Table).

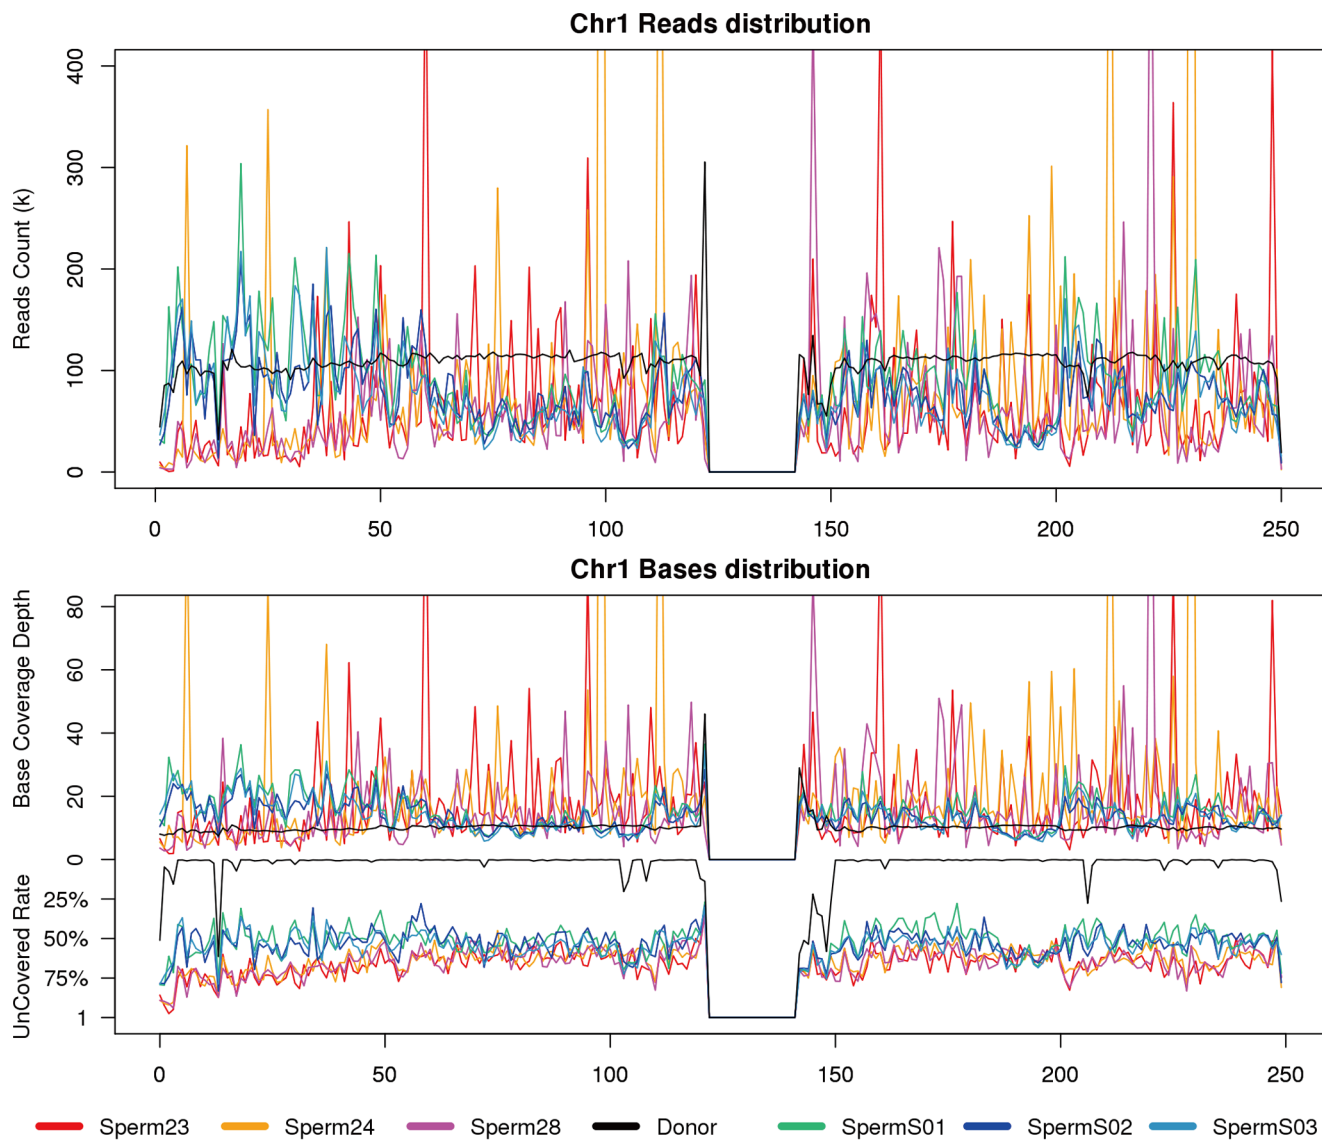

**Fig. 3. Genomic coverage on chromosome 1 (Chr01).** Tiling window size is 1 M. (a) Reads counts in each window; (b) Base coverage depth (upper) and uncovered base rate (lower) in each window. Sperm 23~28 are MDA samples and Sperm S01~S03 are MALBAC samples. Refer to supplemental figures for other autosomes.

doi:10.1371/journal.pone.0114520.g003



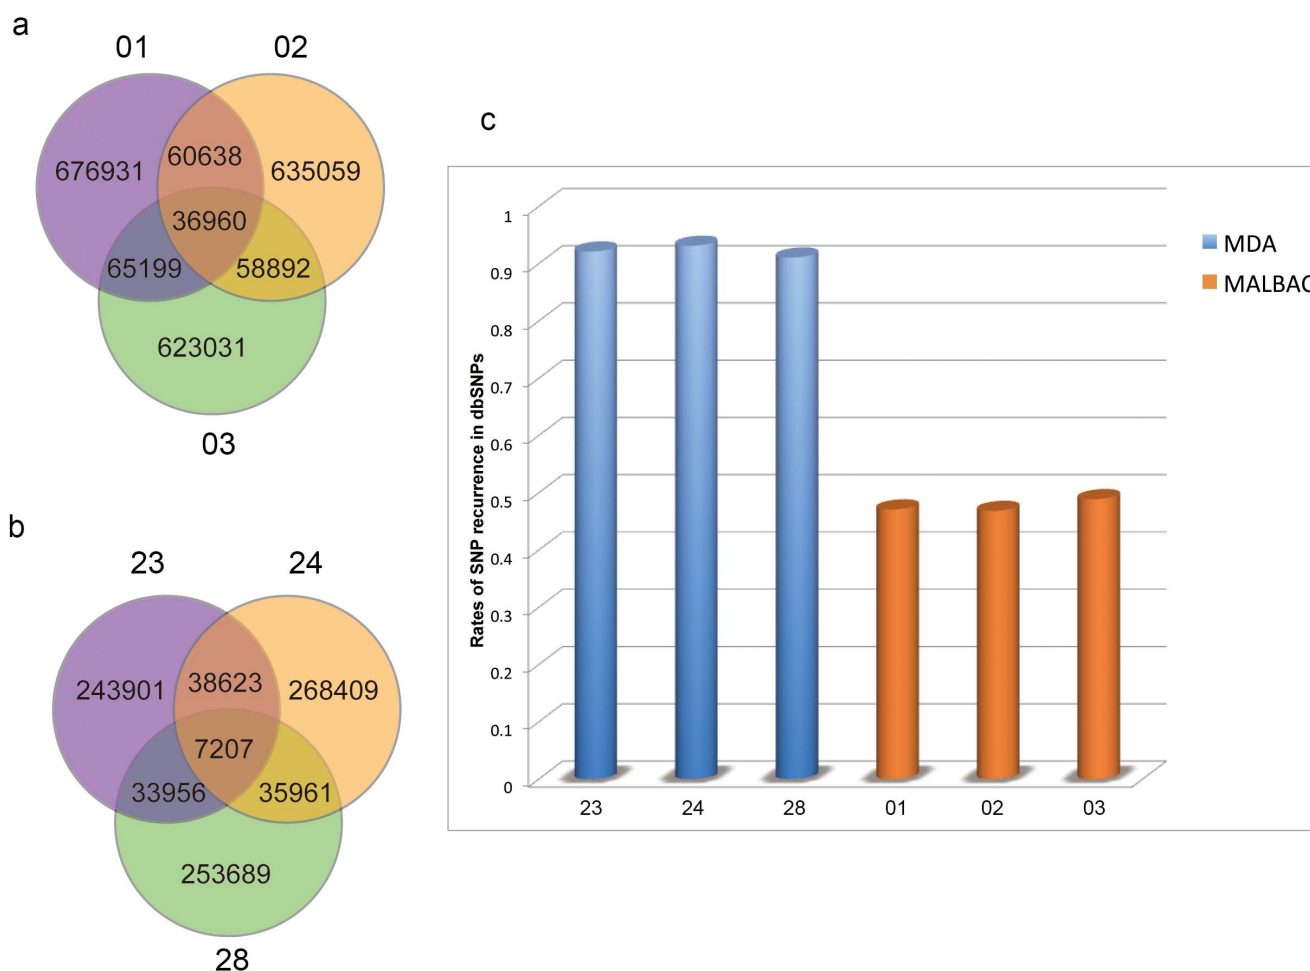

**Fig. 4. Evaluation of the SNP quality.** Venn diagram shows the SNPs share among (a) MALBAC samples and (b) MDA samples; (c) Histogram represents the rates of SNP recurrence in dbSNP.

doi:10.1371/journal.pone.0114520.g004

In genetics, mutations can be transitions between purines (A↔G) or pyrimidines (C↔T), or transversions of a purine for a pyrimidine or vice versa. The occurrences of both types in the samples are in line, and there are twice as many possible transitions as transversions ([S2 Figure](#) and [S7 Table](#)). Oxidative deamination and tautomerization can cause transitions, whereas ionizing radiation and alkylating agents can cause transversions. Because transversions dramatically change their chemical structure, the consequences are often more drastic than those of transitions. Thus, precise acquisition of mutation types is important in the application of amplification methods, especially in cancer researches [25].

The SNP calling quality based on the two amplification methods is another critical concern, in particular for applications in population studies. The quality of SNPs derived from MALBAC and MDA samples were evaluated using NCBI Human dbSNP. It is evident that percentages of SNPs from MALBAC samples

validated in dbSNP were significantly higher than those from MDA. As dbSNP accepts submissions of common as well as polymorphic variations, and contains both germline and somatic variations [23], our comparison indicated that the SNP quality of MALBAC approach would be higher than that of MDA.

## Discussion

Whole-genome amplification strategy is imperative for a single-cell sequencing project. We compared the MDA and MALBAC methods from the perspective of uniformity, reproducibility and specificity. Generally, MALBAC offers a better genomic coverage with less amplification bias, as it is a technic improvement based on MDA methods. Using two enzymes strand displacements and PCR amplification, MALBAC probably introduces sequence specific bias, which was evaluated by genomic coverage and sequencing depth in sliding windows. Error rates introduced by *Taq* polymerase ( $5E-6$ ) in regular PCR in MALBAC will be 10 times higher than that in MDA, considering two round of so-called quansi-linear amplification.

However, MALBAC exhibits a high level of specificity and reproducibility, which facilitate its application in population re-sequencing projects. As genomic regions amplified using MDA show substantial difference among samples, it is hard to apply in genetic map construction based on single sperm sequencing. Instead, MDA will provide more genomic coverage for sequencing if mix more cells.

## Supporting Information

**S1 Figure.** The distribution of sequencing depth for each sample.

[doi:10.1371/journal.pone.0114520.s001](https://doi.org/10.1371/journal.pone.0114520.s001) (TIF)

**S2 Figure.** Spectrum distribution of allele types in each sample.

[doi:10.1371/journal.pone.0114520.s002](https://doi.org/10.1371/journal.pone.0114520.s002) (TIF)

**S1 Table.** Sample list with accession numbers.

[doi:10.1371/journal.pone.0114520.s003](https://doi.org/10.1371/journal.pone.0114520.s003) (DOCX)

**S2 Table.** Goodness-of-fit test to match  $K$ -mer distribution to Possion probability mass function of the theoretic lambda and compare MDA & MALBAC  $K$ -mer distribution to the blood  $K$ -mer distribution with Kolmogorov-Smirnov test.

[doi:10.1371/journal.pone.0114520.s004](https://doi.org/10.1371/journal.pone.0114520.s004) (DOCX)

**S3 Table.** The ratio of single-cell sequencing and mapping in diferent samples.

[doi:10.1371/journal.pone.0114520.s005](https://doi.org/10.1371/journal.pone.0114520.s005) (DOCX)

**S4 Table.** Coefficient of variation of coverage in 1Mb windows on autosomes.

[doi:10.1371/journal.pone.0114520.s006](https://doi.org/10.1371/journal.pone.0114520.s006) (DOCX)

**S5 Table.** Pairwise Kendall's  $\tau$  coefficient test of base coverage of different samples on autosomes.

[doi:10.1371/journal.pone.0114520.s007](https://doi.org/10.1371/journal.pone.0114520.s007) (DOCX)

**S6 Table.** Statistics of SNP calling in different samples.

[doi:10.1371/journal.pone.0114520.s008](https://doi.org/10.1371/journal.pone.0114520.s008) (DOCX)

**S7 Table.** Distribution of allele types in different samples.

[doi:10.1371/journal.pone.0114520.s009](https://doi.org/10.1371/journal.pone.0114520.s009) (DOCX)

**S1 File.** The joint distribution of *K*-mer frequency in the rest randomly paired samples.

[doi:10.1371/journal.pone.0114520.s010](https://doi.org/10.1371/journal.pone.0114520.s010) (ZIP)

**S2 File.** Genomic coverage on the rest chromosomes. Tiling window size is 1 M. (a) Reads counts in each window. (b) Base coverage depth (upper) and uncovered base rate (lower) in each window. Sperm 23~28 are MDA samples and Sperm S01~S03 are MALBAC samples.

[doi:10.1371/journal.pone.0114520.s011](https://doi.org/10.1371/journal.pone.0114520.s011) (ZIP)

## Acknowledgments

We appreciate HY Liu from University of Colorado for his valuable comments on statistics. This work was supported by School of Bioscience and Bioengineering, South China University of Technology and BGI-Shenzhen. This project was granted by the National Natural Science Foundation of China (31271322) and the Fundamental Research Funds for the Central Universities of South China University of Technology (2014ZG0017). BGI-Shenzhen provided support in the form of salaries for authors MC, XH, SZ & SG, but did not have any additional role in the study design, data collection and analysis, decision to publish, or preparation of the manuscript. The specific roles of these authors are articulated in the "author contributions" section.

## Author Contributions

Conceived and designed the experiments: FL SG SZ. Analyzed the data: MC PS DZ XH. Wrote the paper: SZ MC SG XH.

## References

1. Hou Y, Fan W, Yan L, Li R, Lian Y, et al. (2013) Genome analyses of single human oocytes. *Cell* 155: 1492–1506.
2. Lu S, Zong C, Fan W, Yang M, Li J, et al. (2012) Probing meiotic recombination and aneuploidy of single sperm cells by whole-genome sequencing. *Science* 338: 1627–1630.
3. Wang J, Fan HC, Behr B, Quake SR (2012) Genome-wide single-cell analysis of recombination activity and de novo mutation rates in human sperm. *Cell* 150: 402–412.
4. Evrony GD, Cai X, Lee E, Hills LB, Elhosary PC, et al. (2012) Single-neuron sequencing analysis of L1 retrotransposition and somatic mutation in the human brain. *Cell* 151: 483–496.
5. Zong C, Lu S, Chapman AR, Xie XS (2012) Genome-wide detection of single-nucleotide and copy-number variations of a single human cell. *Science* 338: 1622–1626.
6. Hou Y, Song L, Zhu P, Zhang B, Tao Y, et al. (2012) Single-cell exome sequencing and monoclonal evolution of a JAK2-negative myeloproliferative neoplasm. *Cell* 148: 873–885.

7. **Telenius H, Carter NP, Bebb CE, Nordenskjold M, Ponder BA, et al.** (1992) Degenerate oligonucleotide-primed PCR: general amplification of target DNA by a single degenerate primer. *Genomics* 13: 718–725.
8. **Zhang L, Cui X, Schmitt K, Hubert R, Navidi W, et al.** (1992) Whole genome amplification from a single cell: implications for genetic analysis. *Proc Natl Acad Sci U S A* 89: 5847–5851.
9. **Dean FB, Nelson JR, Giesler TL, Lasken RS** (2001) Rapid amplification of plasmid and phage DNA using Phi 29 DNA polymerase and multiply-primed rolling circle amplification. *Genome Res* 11: 1095–1099.
10. **Zhang K, Martiny AC, Reppas NB, Barry KW, Malek J, et al.** (2006) Sequencing genomes from single cells by polymerase cloning. *Nat Biotechnol* 24: 680–686.
11. **Lao K, Xu NL, Straus NA** (2008) Whole genome amplification using single-primer PCR. *Biotechnol J* 3: 378–382.
12. **Dietmaier W, Hartmann A, Wallinger S, Heinmoller E, Kerner T, et al.** (1999) Multiple mutation analyses in single tumor cells with improved whole genome amplification. *Am J Pathol* 154: 83–95.
13. **Dean FB, Hosono S, Fang L, Wu X, Faruqi AF, et al.** (2002) Comprehensive human genome amplification using multiple displacement amplification. *Proc Natl Acad Sci U S A* 99: 5261–5266.
14. **Lasken RS** (2009) Genomic DNA amplification by the multiple displacement amplification (MDA) method. *Biochem Soc Trans* 37: 450–453.
15. **Voet T, Kumar P, Van Loo P, Cooke SL, Marshall J, et al.** (2013) Single-cell paired-end genome sequencing reveals structural variation per cell cycle. *Nucleic Acids Res* 41: 6119–6138.
16. **Lasken RS, Stockwell TB** (2007) Mechanism of chimera formation during the Multiple Displacement Amplification reaction. *BMC Biotechnol* 7: 19.
17. **Lasken RS** (2013) Single-cell sequencing in its prime. *Nat Biotechnol* 31: 211–212.
18. **Gundry M, Li W, Maqbool SB, Vijg J** (2012) Direct, genome-wide assessment of DNA mutations in single cells. *Nucleic Acids Res* 40: 2032–2040.
19. **Deorowicz S, Debudaj-Grabysz A, Grabowski S** (2013) Disk-based k-mer counting on a PC. *BMC Bioinformatics* 14: 160.
20. **Li X, Waterman MS** (2003) Estimating the repeat structure and length of DNA sequences using L-tuples. *Genome Res* 13: 1916–1922.
21. **Li H, Durbin R** (2010) Fast and accurate long-read alignment with Burrows-Wheeler transform. *Bioinformatics* 26: 589–595.
22. **Li H, Handsaker B, Wysoker A, Fennell T, Ruan J, et al.** (2009) The Sequence Alignment/Map format and SAMtools. *Bioinformatics* 25: 2078–2079.
23. **Coordinators NR** (2013) Database resources of the National Center for Biotechnology Information. *Nucleic Acids Res* 41: D8–D20.
24. **Pushkarev D, Neff NF, Quake SR** (2009) Single-molecule sequencing of an individual human genome. *Nat Biotechnol* 27: 847–850.
25. **Hanahan D, Weinberg RA** (2011) Hallmarks of cancer: the next generation. *Cell* 144: 646–674.
